# Supplementary material for: In Silico Prediction for Intestinal Absorption and Brain Penetration of Chemical Pesticides in Humans
Source: MDPI journal article supplement (doi:10.3390/ijerph14070708), 2017-06-30
Supplement: s1 [file s1]

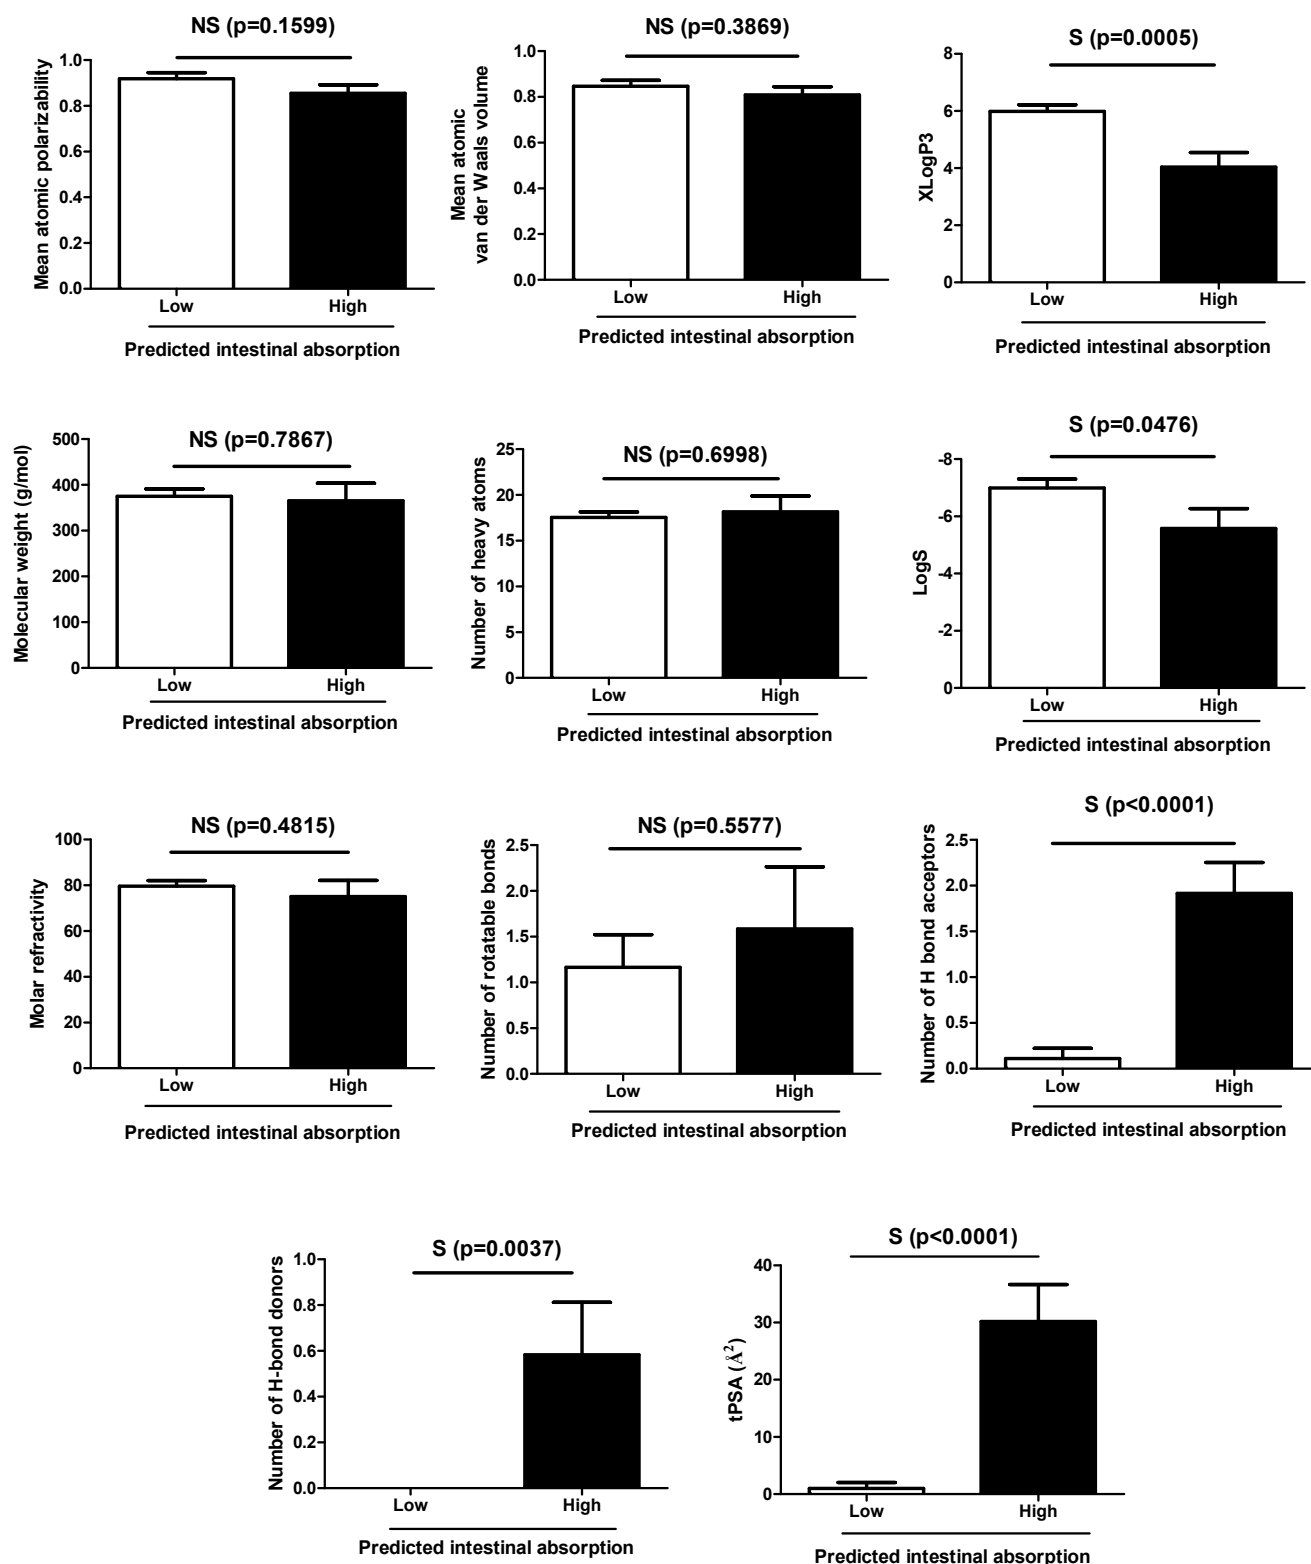

Figure S1: Physico-chemical parameters of organochlorines (n=30) predicted to display low or high intestinal absorption. S, statistically significant ( $p < 0.05$ ); NS, not statistically significant ( $p > 0.05$ ). Statistical analysis was performed with the unpaired Student's t test, excepted for the number of H-bond donors for which the Mann-Whitney test was used (due to the fact that unpaired Student's t test was not applicable because all the values for predicted low-permeant organochlorines are identical).
